# Supplementary material for: Innovative Preparation of Cellulose-Mediated Silver Nanoparticles for Multipurpose Applications: Experiment and Molecular Docking Studies
Source: PubMed Central journal article supplement — ACS Omega. 2023 Oct 10;8(42):38860–70. doi: 10.1021/acsomega.3c02432 (PMC10601087; doi:10.1021/acsomega.3c02432), 2023-10-10
Supplement: ao3c02432_si_001.pdf [file ao3c02432_si_001.pdf]

## Supplementary information

# Innovative preparation of cellulose-mediated silver nanoparticles for multipurpose applications: experiment and molecular docking studies

Arularasu M. Visagamani <sup>a\*</sup>, Durairaj Shanthy <sup>b</sup>, Appusamy Muthukrishnaraj <sup>c</sup>, Babu Venkatadri<sup>d</sup>,  
J. Irshad Ahamed <sup>e</sup>, Kasinathan Kaviyarasu <sup>f,g\*</sup>

<sup>a</sup>Department of Electronic Engineering, Chang Gung University, Taoyuan City - 33302, Taiwan.

<sup>b</sup>Department of Chemistry, VelTech MultiTech Dr. Rangarajan Dr. Sakunthala Engineering College, Avadi, Chennai - 600062, India.

<sup>c</sup>Department of Chemistry, Faculty of Engineering, Karpagam Academy of Higher Education, Coimbatore - 641021, Tamil Nadu, India.

<sup>d</sup>Department of Biomedical Science and Environmental Biology, Kaohsiung Medical University, Kaohsiung - 80708, Taiwan, ROC.

<sup>e</sup>Department of Chemistry, Kandaswami Naidu College for Men, Anna Nagar East, Chennai - 600102, India.

<sup>f</sup>UNESCO-UNISA Africa Chair in Nanosciences/Nanotechnology Laboratories, College of Graduate Studies, University of South Africa (UNISA), Muckleneuk Ridge, Pretoria, South Africa.

<sup>g</sup>Nanosciences African Network (NANOAFNET), Materials Research Group (MRG), iThemba LABS-National Research Foundation (NRF), 1 Old Faure Road, Somerset West - 7129, Western Cape Province, South Africa.

\*Corresponding author: [arulrs597@gmail.com](mailto:arulrs597@gmail.com) (Arularasu M. Visagamani)  
[kavi@tlabs.ac.za](mailto:kavi@tlabs.ac.za) (K. Kaviyarasu)

## 1. Materials preparation

Silver nitrate ( $\text{AgNO}_3$ ),  $\text{NH}_4\text{OH}$ , N,N-dimethylacetamide, urea, Rhodamine B, Sigma Aldrich supplied the AR grade of 2,2,6,6-tetramethylpiperidine-1-oxyl (TEMPO). Ethanol was purchased from Chem-O-Chem chemicals. All reagents were used without further purification.

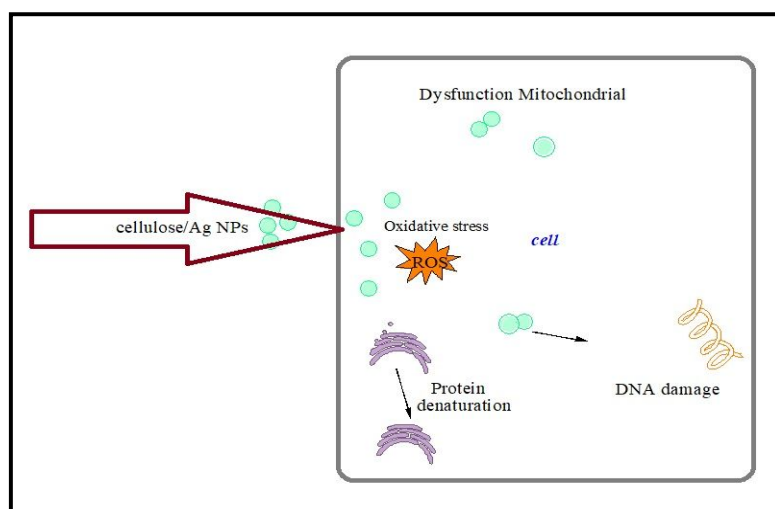

Figure S1. Antibacterial activity mechanism of preparation of cellulose-mediated silver nanoparticles.

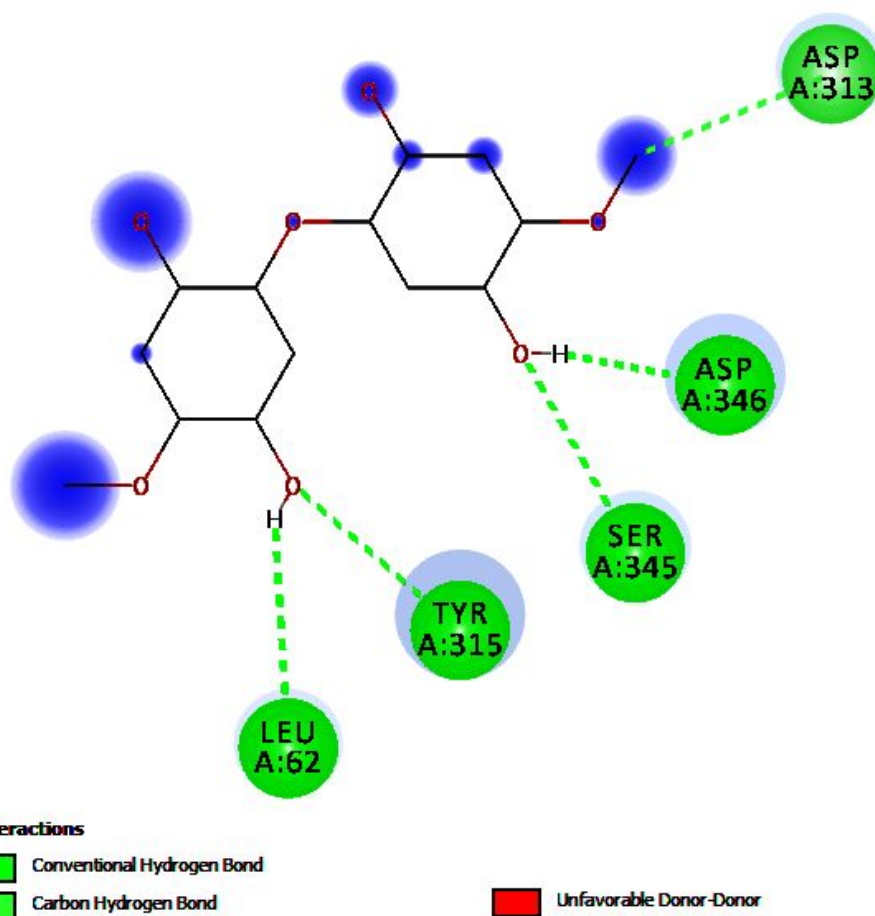

Figure S2. 2D-Hydrogen bond Interaction representation of cellulose/Ag ligand with 1TVF protein.

Table S1. AutoDock Vina results of the binding affinity and RMSD values of different poses in 1TVF inhibitor of cellulose/Ag NPs compounds.

| Mode | Cellulose/Ag -1TVF     |           |          |
|------|------------------------|-----------|----------|
|      | affinity<br>(kcal/mol) | rmsd l.b. | rmsd u.b |
| 1    | -5.8                   | 0.000     | 0.000    |
| 2    | -5.5                   | 19.892    | 21.648   |
| 3    | -5.2                   | 26.973    | 30.766   |
| 4    | -5.1                   | 20.203    | 21.343   |
| 5    | -5.0                   | 14.350    | 17.684   |
| 6    | -4.9                   | 21.263    | 23.617   |

|                                                      |      |        |        |
|------------------------------------------------------|------|--------|--------|
| 7                                                    | -4.9 | 2.975  | 8.035  |
| 8                                                    | -4.9 | 3.783  | 7.551  |
| 9                                                    | -4.8 | 20.814 | 22.984 |
| <b>Inhibition Constant: 55.444 <math>\mu</math>M</b> |      |        |        |

Table S2. The ligand- receptor residue interaction between Cellulose/Ag ligand with 1TVF protein.

| S. NO | Pub chem. Id | Ligand Name  | Residue Interaction     | Type of bond | Distance( Å) |
|-------|--------------|--------------|-------------------------|--------------|--------------|
| 1     | 1TVF         | Cellulose/Ag | : UNKO: H – A: LEU62: O | Hydrogen     | 2.68         |
|       |              |              | A: TYR315: H-: UNKO: O  | Hydrogen     | 2.47         |
|       |              |              | A: SER345: HN-: UNKO: O | Hydrogen     | 2.34         |
|       |              |              | : UNKO: H-A: ASP346: O  | Hydrogen     | 2.20         |
|       |              |              | : UNKO: C-A: ASP313: O  | Hydrogen     | 3.48         |

- In residue interaction column (UNK0) Symbol is described as ligand side functional groups such as O, S, N.....etc.
- X is taken Receptor protein chain.

Table S3. Percentage degradation of Rhodamine B on to cellulose/Ag

| S. No | Sample       | % Degradation Rhodamine B |
|-------|--------------|---------------------------|
| 1     | Blank        | 7.37                      |
| 2     | Ag           | 37.68                     |
| 3     | Cellulose/Ag | 97.38                     |

Table S4. Rate constant  $k_{abs}$  value for the degradation of Rhodamine B on to Cellulose/Ag

| Samples            | $k \text{ min}^{-1}$ |              |
|--------------------|----------------------|--------------|
|                    | Blank                | Cellulose/Ag |
| <b>Rhodamine B</b> | 0.0004               | 0.0181       |

## Cover Sheet

**Title:** Innovative preparation of cellulose-mediated silver nanoparticles for multipurpose applications: experiment and molecular docking studies

**Author name and affiliation:**

***Arularasu M. Visagamani***

Department of Electronic Engineering, Chang Gung University, Taoyuan City - 33302, Taiwan.

***Durairaj Shanthy***

Department of Chemistry, VelTech MultiTech Dr. Rangarajan Dr. Sakunthala Engineering College, Avadi, Chennai - 600062, India.

***Appusamy Muthukrishnaraj***

Department of Chemistry, Faculty of Engineering, Karpagam Academy of Higher Education, Coimbatore-641021, Tamil Nadu, India.

***Babu Venkatadri***

Department of Biomedical Science and Environmental Biology, Kaohsiung Medical University, Kaohsiung - 80708, Taiwan, ROC.

***J. Irshad Ahamed***

Department of Chemistry, Kandaswami Naidu College for Men, Anna Nagar East, Chennai, 600102, India.

***Kasinathan Kaviyarasu***

(i)UNESCO-UNISA Africa Chair in Nanosciences/Nanotechnology Laboratories, College of Graduate Studies, University of South Africa (UNISA), Muckleneuk Ridge, Pretoria, South Africa.

(ii)Nanosciences African Network (NANOAFNET), Materials Research Group (MRG), iThemba LABS-National Research Foundation (NRF), 1 Old Faure Road, Somerset West-7129, Western Cape Province, South Africa.
